# Supplementary material for: Evaluation of cloud and precipitation processes in regional and global models with ULTIMATE (ULTra-sIte for Measuring Atmosphere of Tokyo metropolitan Environment): A case study using the dual-polarization Doppler weather radars
Source: Research Square preprint supplement (doi:10.21203/rs.3.rs-1484431/v1), 2022-03-31
Supplement: Supplementary file 1 [file a76f6b6df9f0ac6a1d8775e2.docx]

## Appendix: Observation data for ULTIMATE

The observation data used for the ULTIMATE framework include the multi-frequency lidar (355 nm, 10 ch), the high spectrally resolved lidar (355 nm), high spectral resolution lidar (355 nm), Doppler lidar (355 nm), coherent Doppler lidar, HG-Spider 94GHz Doppler radar, and wind profiler at NICT, and Mie polarization lidar (532 nm polarization, 1064 nm), multi-view angle multiple-scattering polarization lidar (532 nm), Multi-view Angle Multiple Scatter Polarization LIDAR (532 nm), and High Spectral Resolution LIDAR (532 nm). These are deployed by the EarthCARE satellite validation team of Kyushu University and the National Institute for Environmental Studies (NIES). The National Research Institute for Earth Science and Disaster Prevention (NIED) observes cloud and rain particle size distributions using the Fog Monitor and Laser Precipitation Monitor at Tokyo Sky Tree for ground validation. Existing X-band and Ka-Band radar data in NIED are available. In addition, routine observation data from JMA is available. In March 2020, the JMA’s C-band dual-polarization Doppler radar was deployed in Kashiwa City for the first time in Japan and is scheduled to be deployed nationwide. In addition, data from the dual-polarization airport Doppler radars already in operation at Haneda and Narita airports can be used, as in this study. The JMA’s wind profiler observations are made at the Katsuura, Kumagaya, Mito, and Kawaguchiko observational sites in the Kanto region.
